# Supplementary material for: Population Pharmacokinetic Model-Based Evaluation of Intact Oxaliplatin in Rats with Acute Kidney Injury
Source: MDPI journal article supplement (doi:10.3390/cancers13246382), 2021-12-20
Supplement: s1 [file s1]

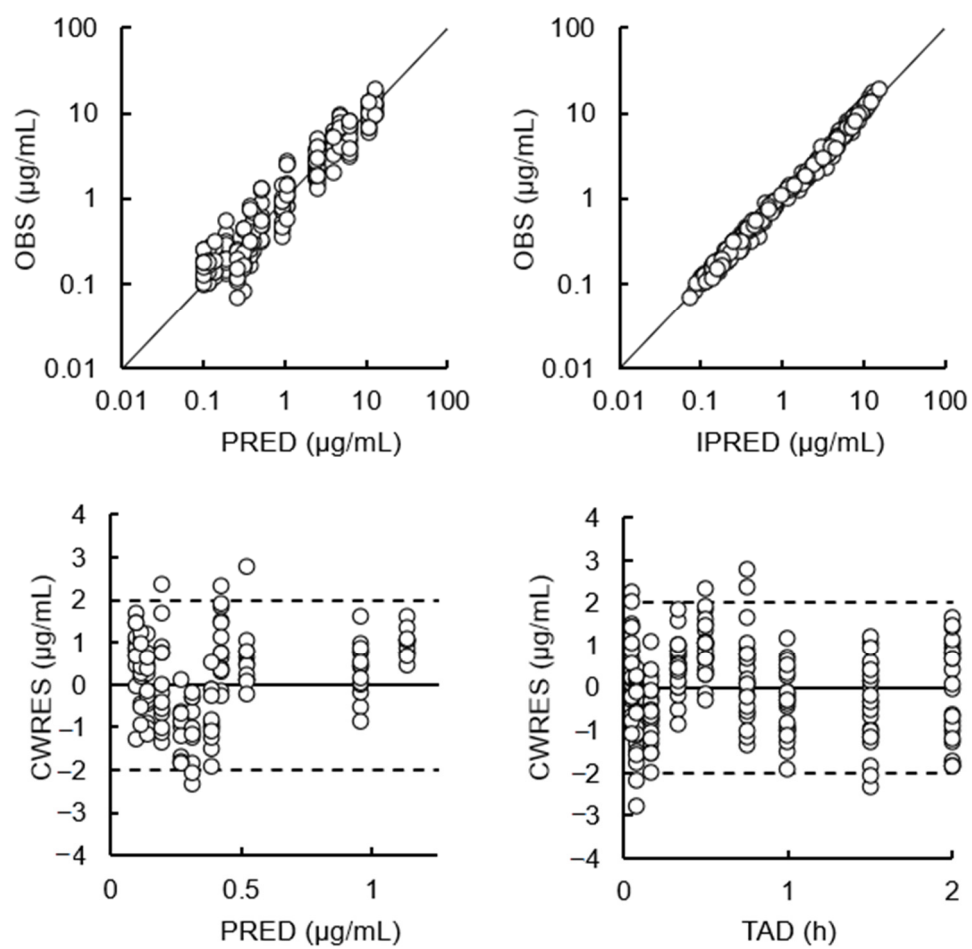

**Figure S1.** Final pharmacokinetics model diagnostic plots of the observed versus predicted concentrations and the conditional residuals versus predicted concentrations.
